# Supplementary material
Source: publisher figshare collection journal article supplement (https://geolsoc.figshare.com/articles/dataset/_/3453110)

**Fig. S1**

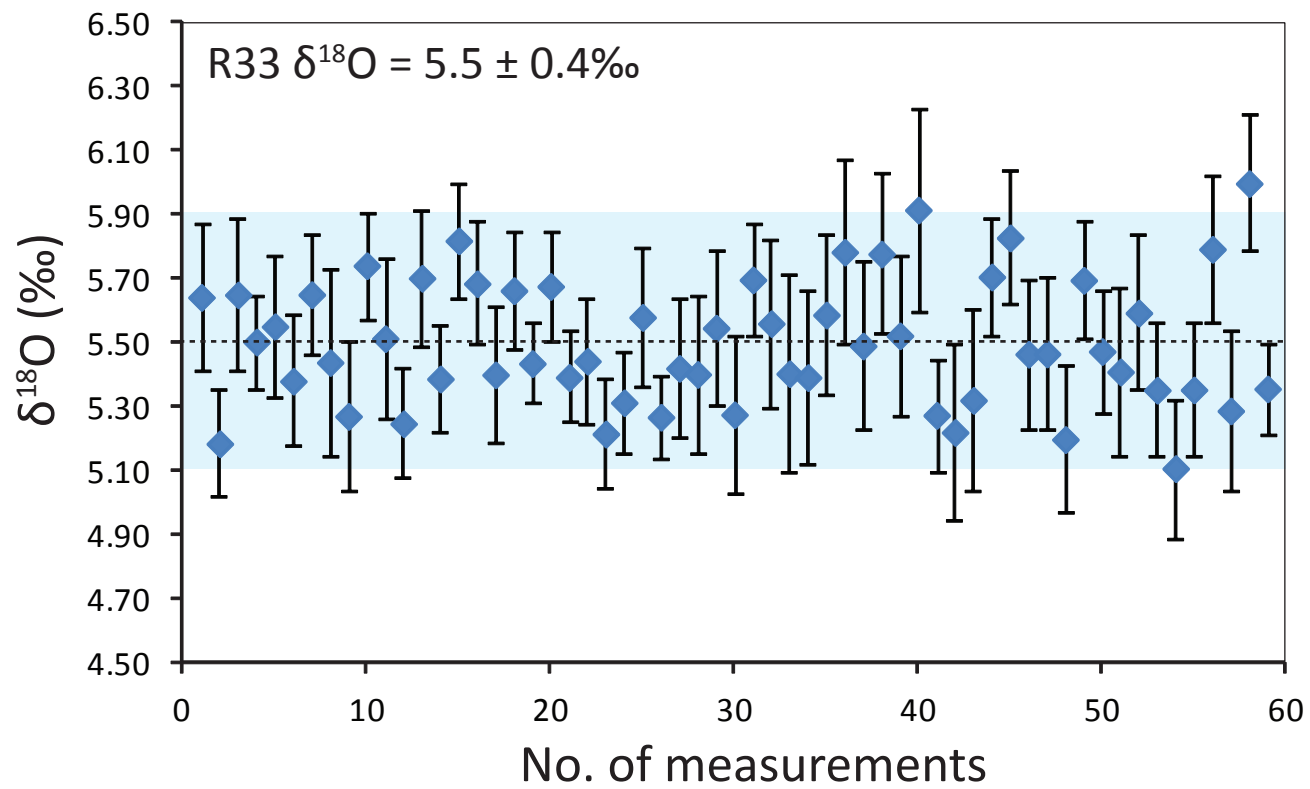

**Fig. S2**

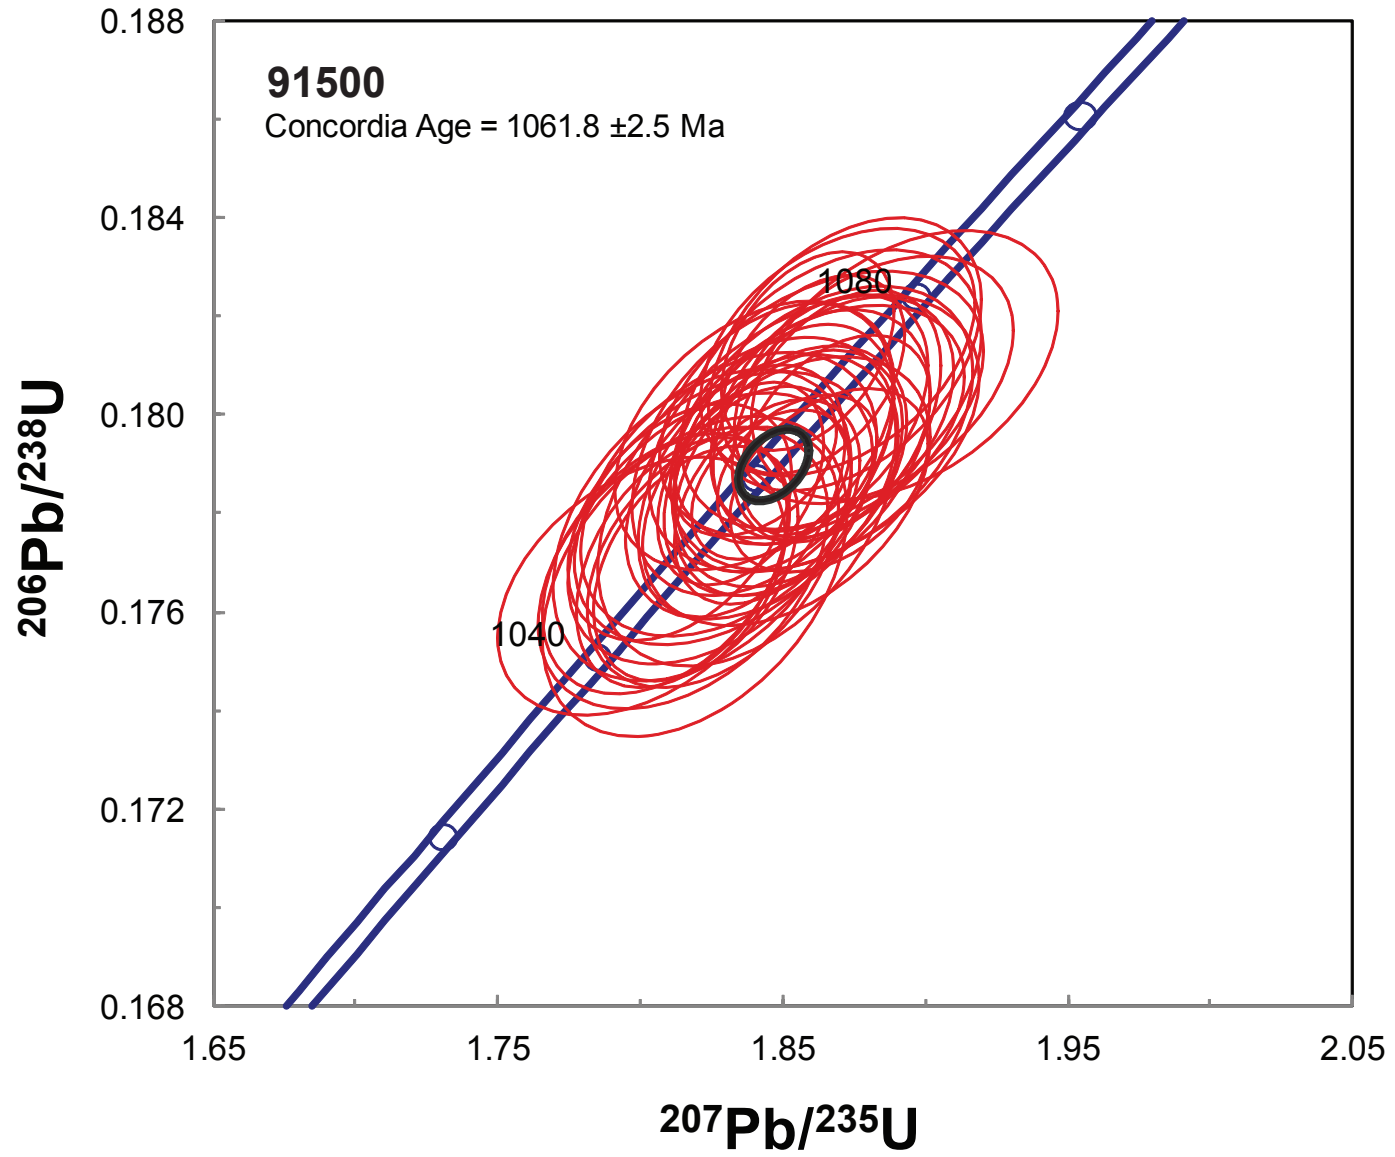

Fig. S3

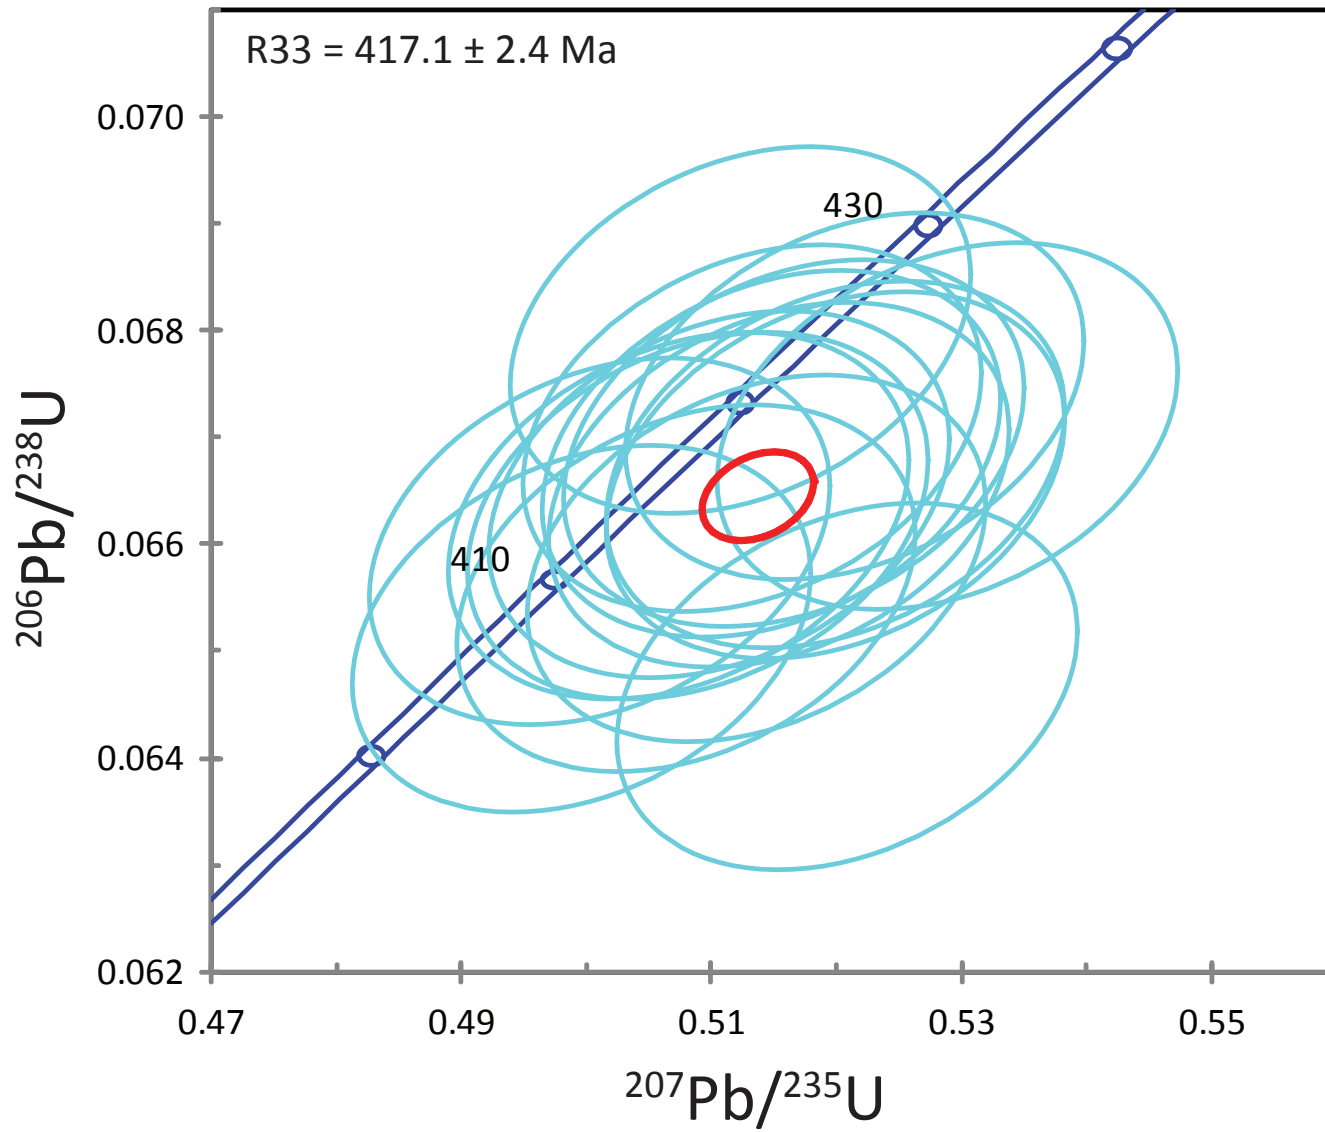

**Fig. S4**

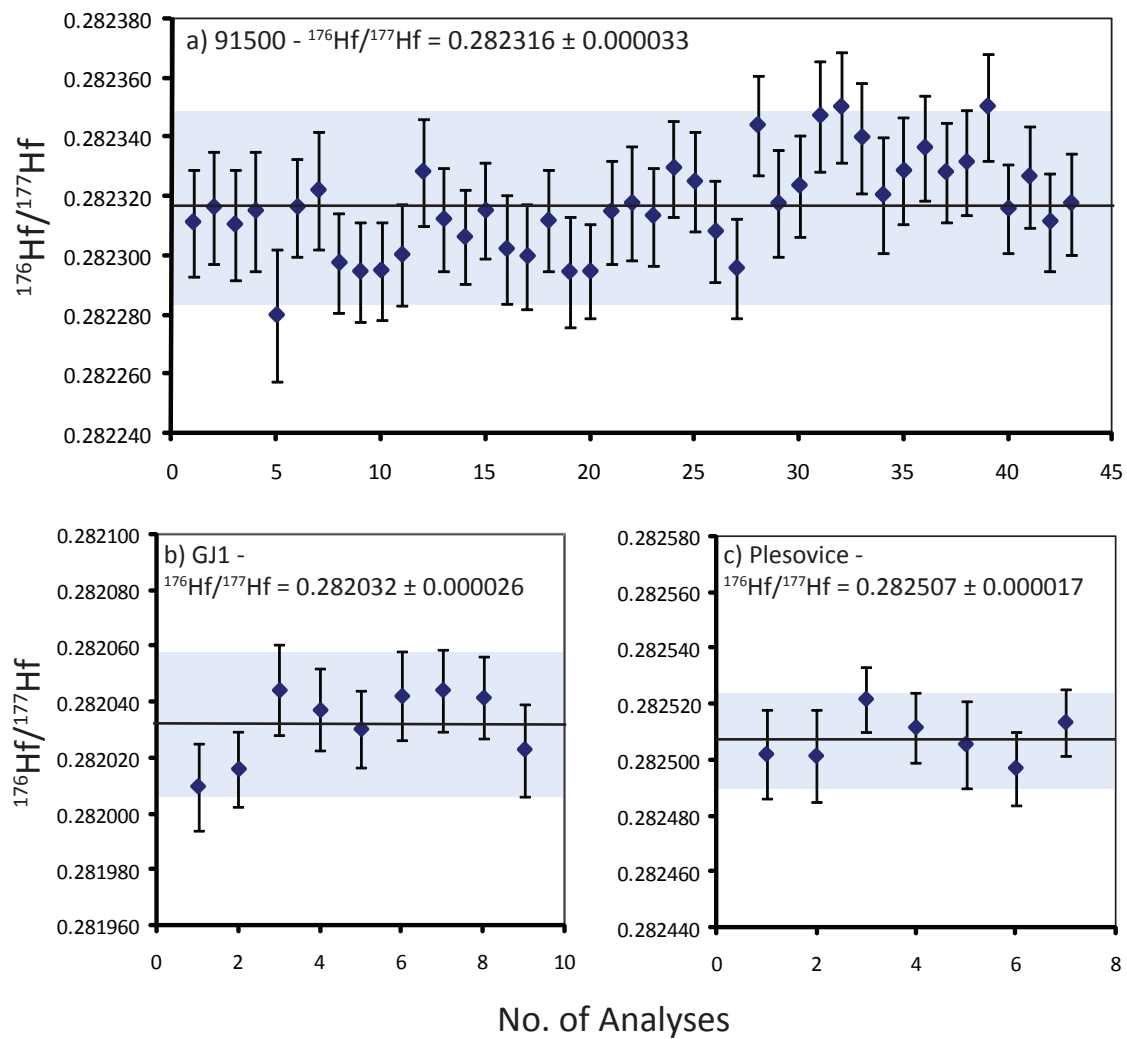

Fig. S5 a

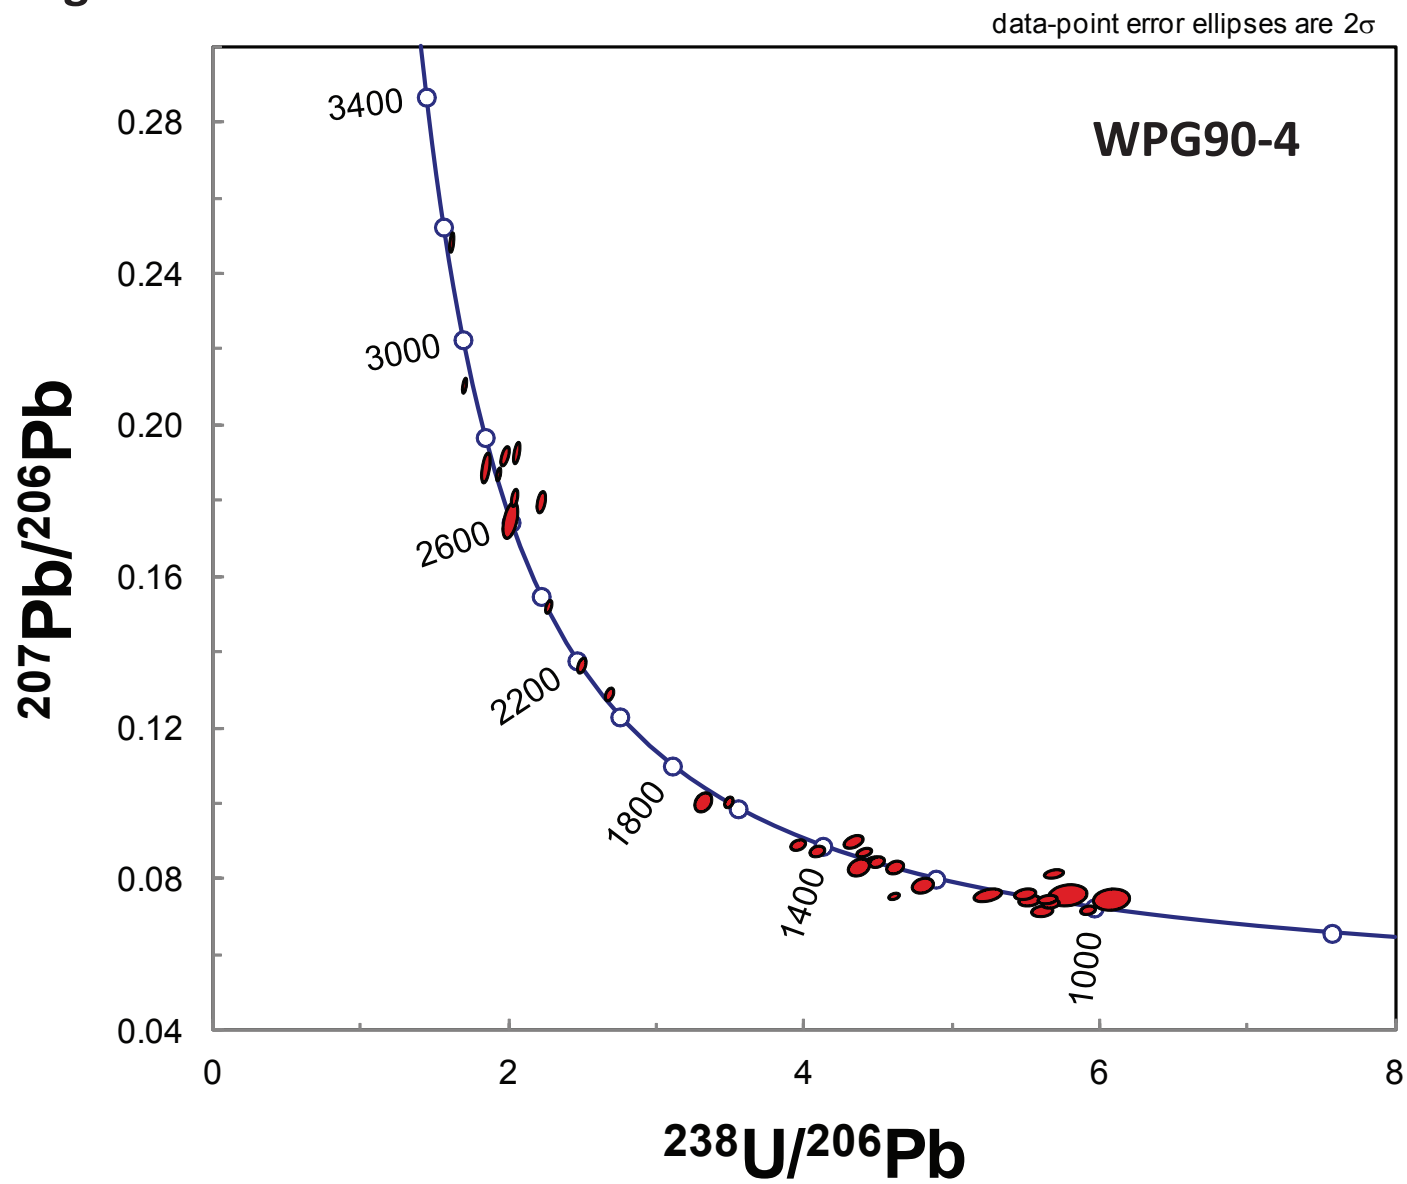

Fig. S5 b

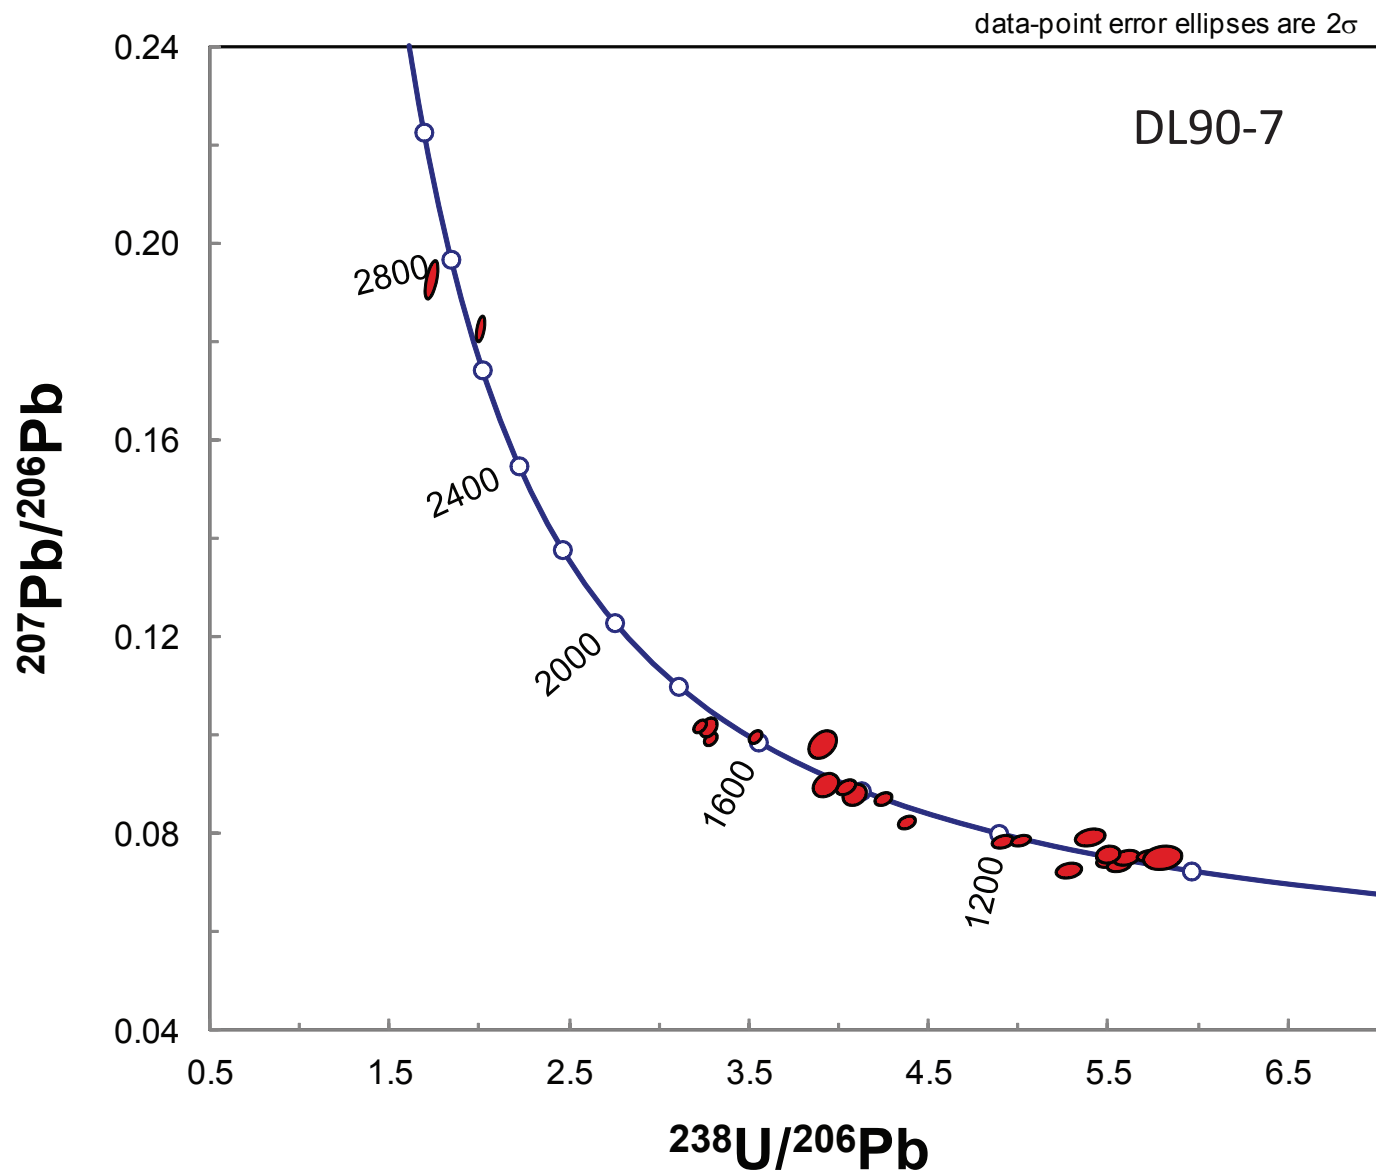

Fig. S5 c

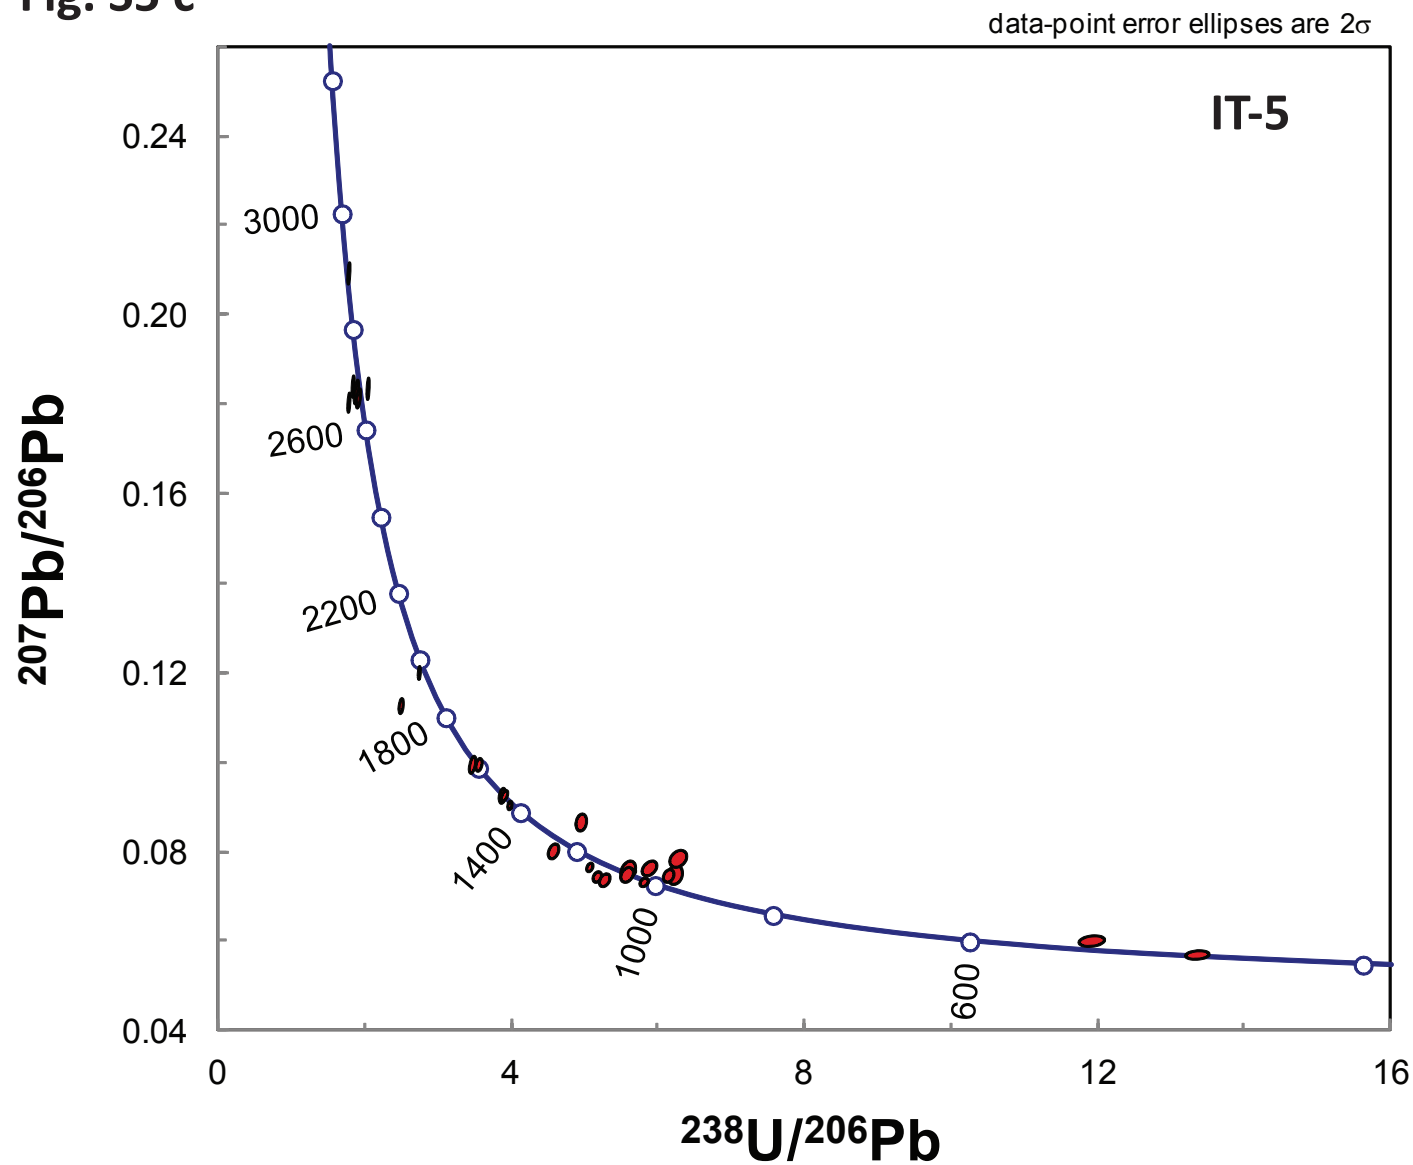

Fig. S5 d

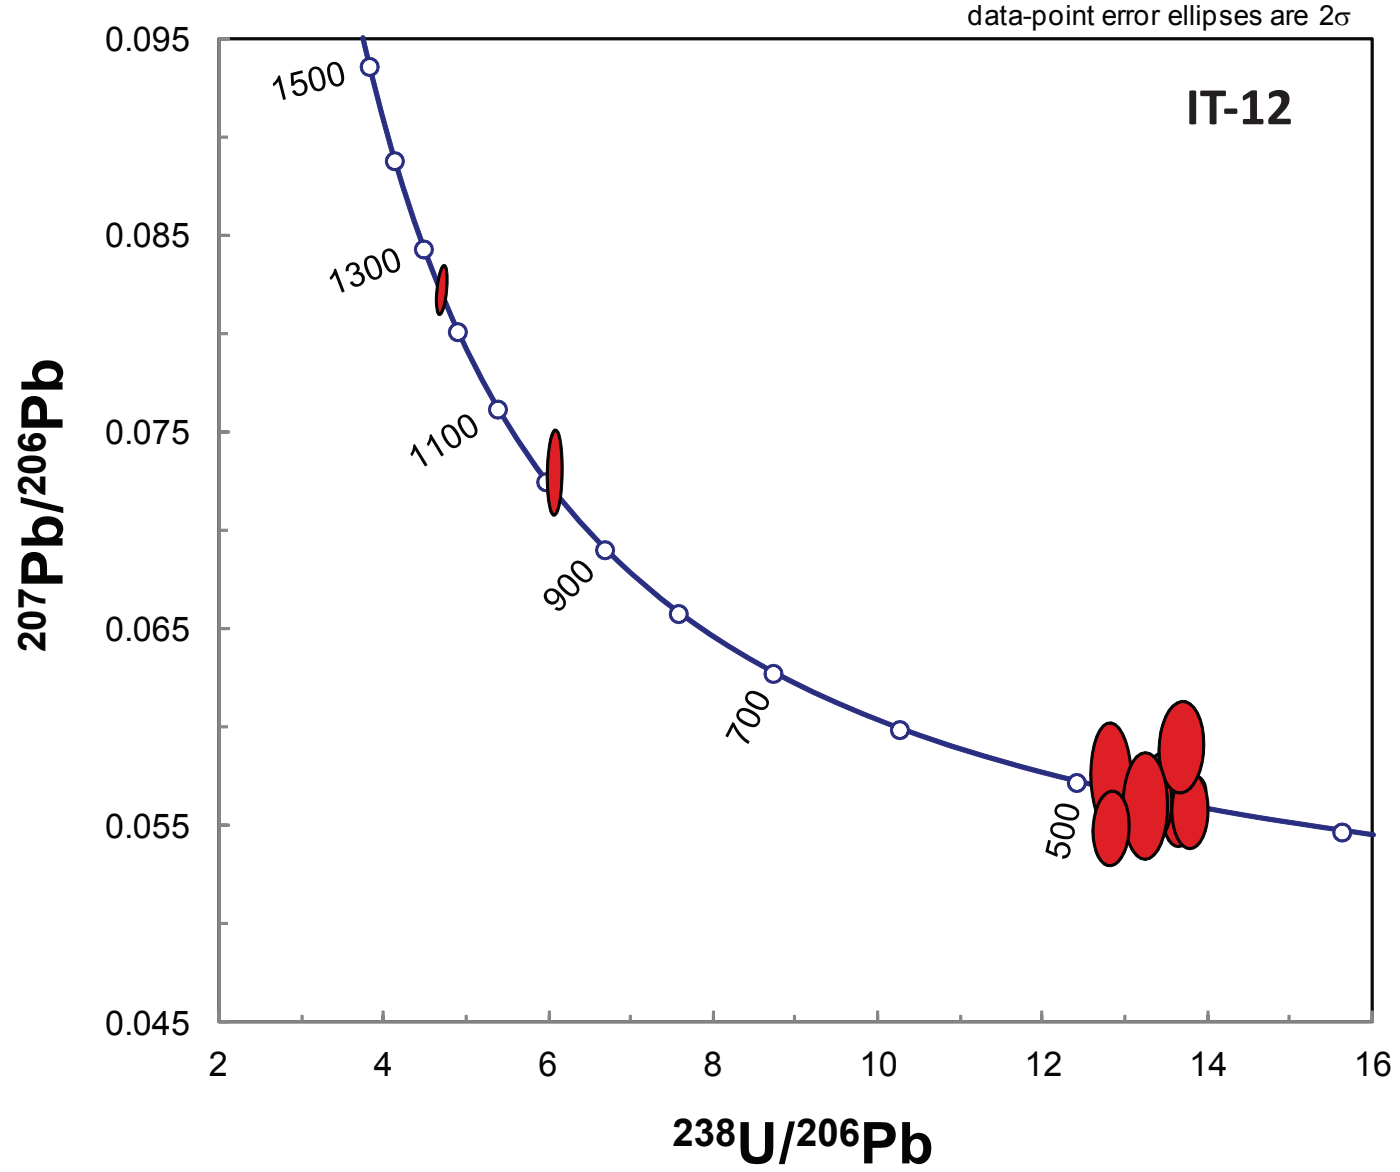



Fig. S5 e

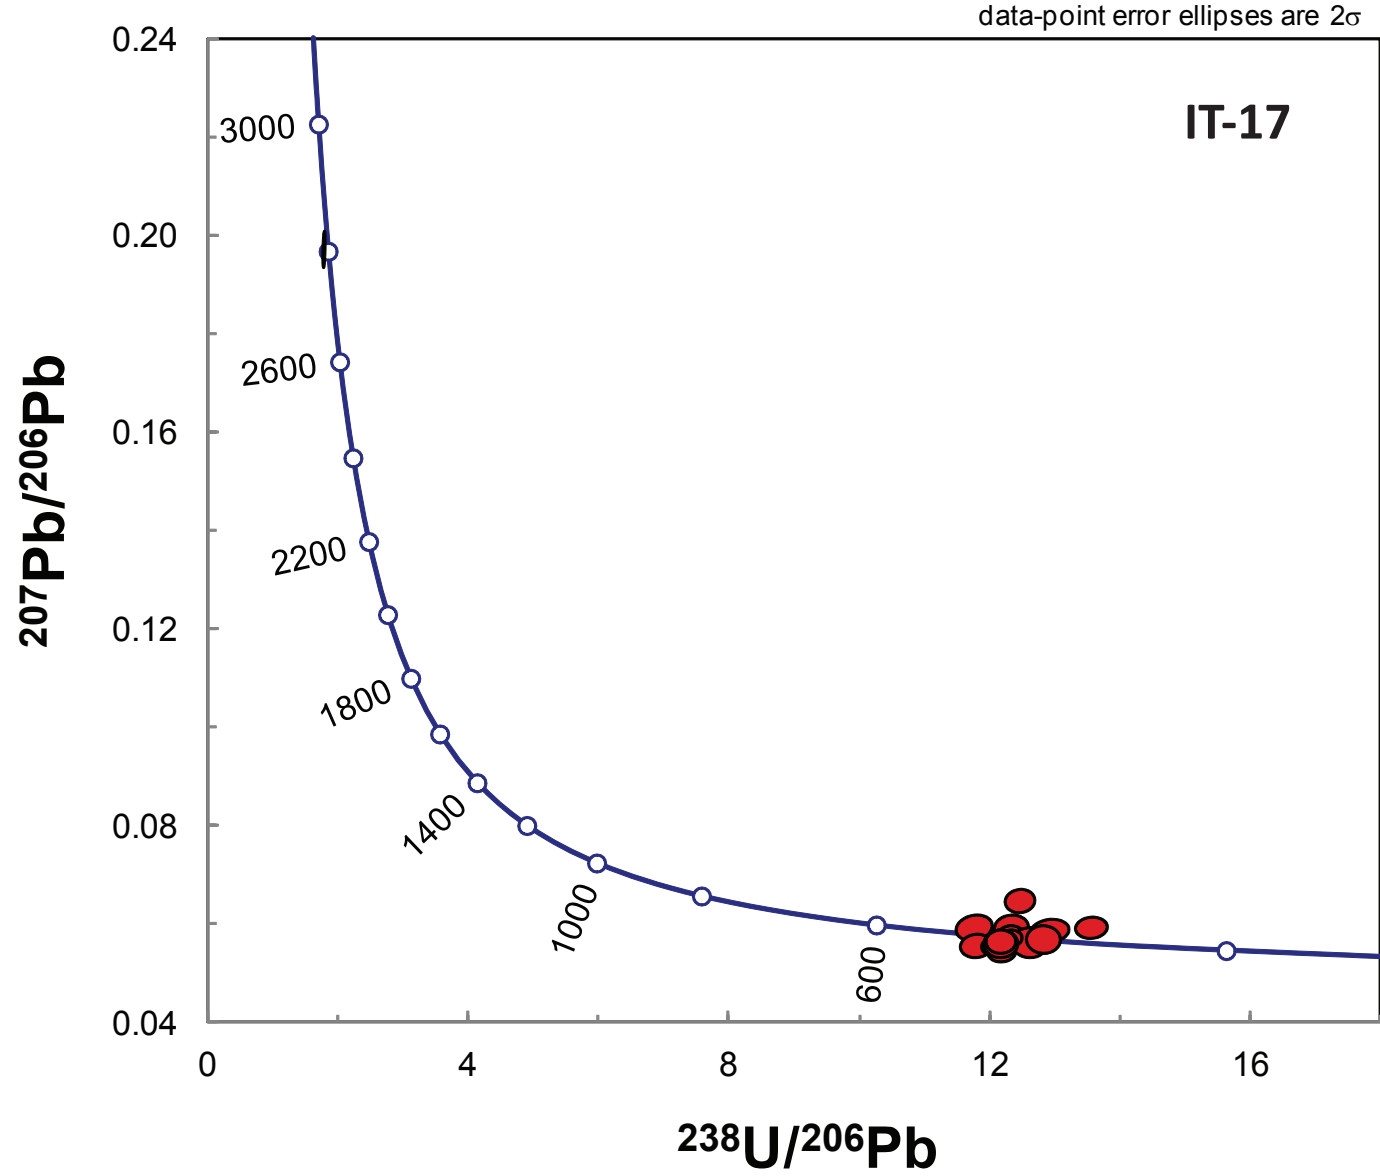

Fig. S5 f

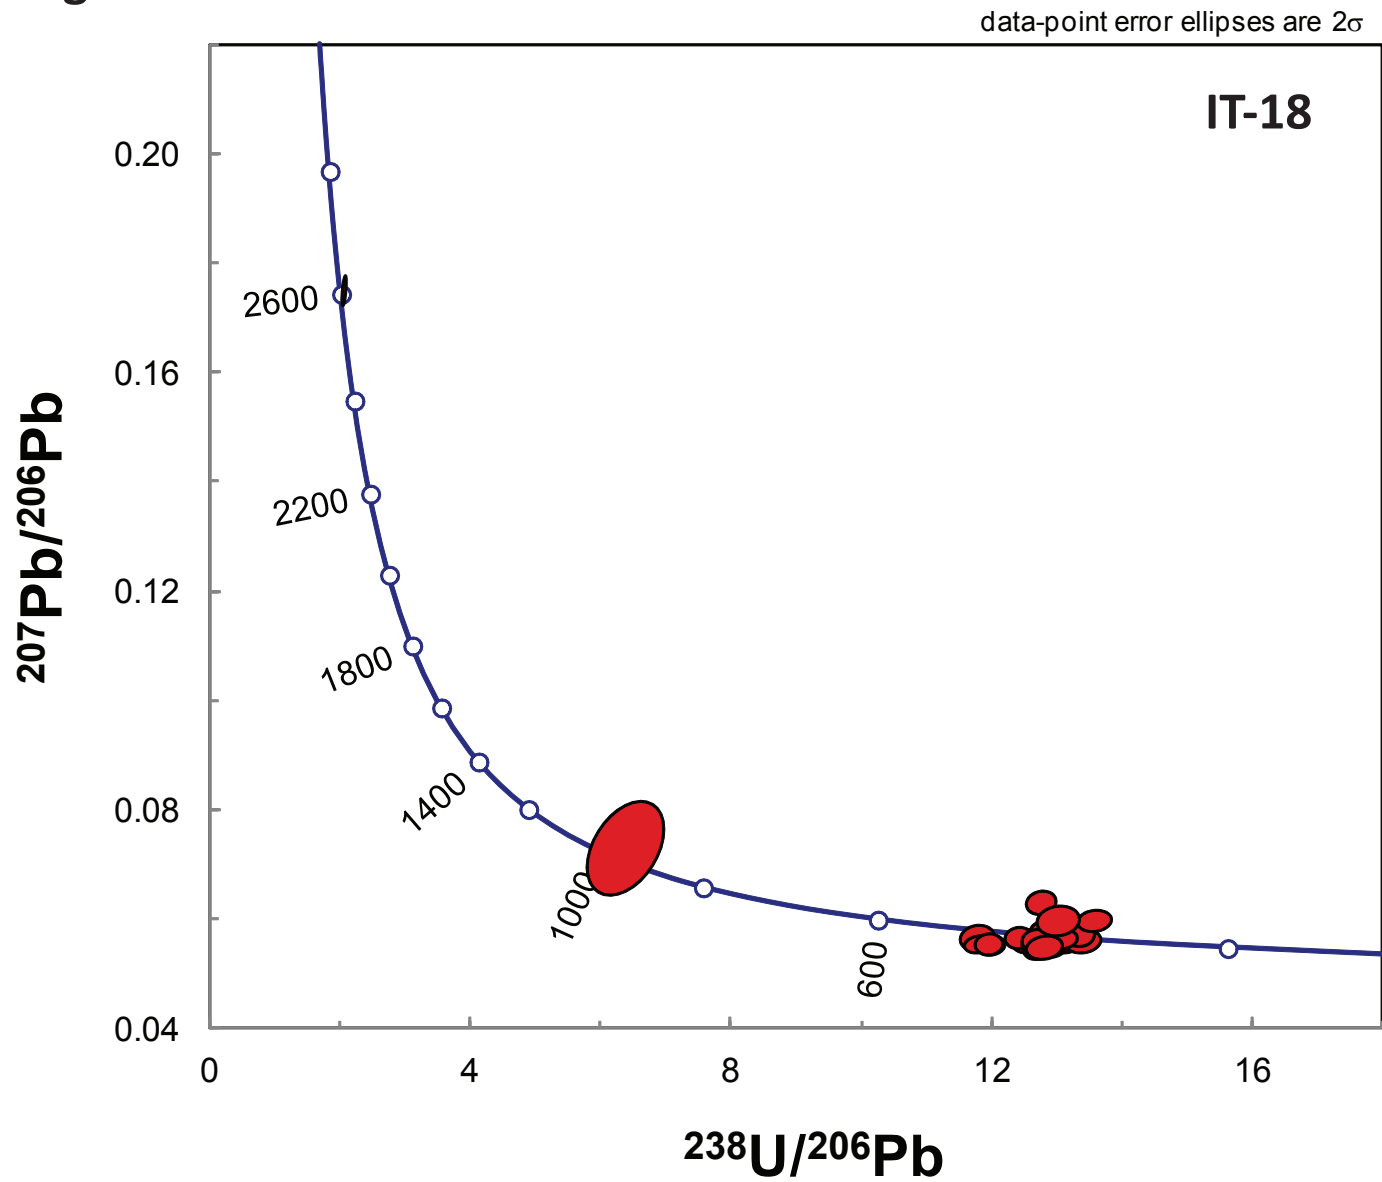

Supplement: Supplementary file 1 [file 1]
